# Supplementary material for: Do low-cost ceramic water filters improve water security in rural SouthAfrica?
Source: Copernicus journal article supplement (doi:10.5194/dwes-9-47-2016), 2016-10-11
Supplement: Supplementary file 1 [file dwes-9-47-2016-supplement.zip]

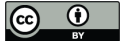

## *Supplement of*

# **Do low-cost ceramic water filters improve water security in rural South Africa?**

**Jens Lange et al.**

*Correspondence to:* Jens Lange ([jens.lange@hydrology.uni-freiburg.de](mailto:jens.lange@hydrology.uni-freiburg.de))

- [dwes-9-47-2016-supplement-title-page.pdf](#)
- [Field\\_survey.txt](#)
- [Laboratory\\_Tests.txt](#)

The copyright of individual parts of the supplement might differ from the CC-BY 3.0 licence.
